# Supplementary material
Source: Springer Nature journal article supplement (https://www.springermedizin.de/resource/supplementary/13046_2009_138_MOESM1_ESM.pdf/9661710)

USER  
INTERFACE

MICRO-  
CONTROLLER

RF CARRIER  
OSCILLATOR

PRECISION  
REFERENCE  
OSCILLATOR

**DDS**  
MODULATION  
FREQUENCY  
GENERATOR

AMPLITUDE  
MODULATOR

RF APPLICATOR  
(PATIENT)

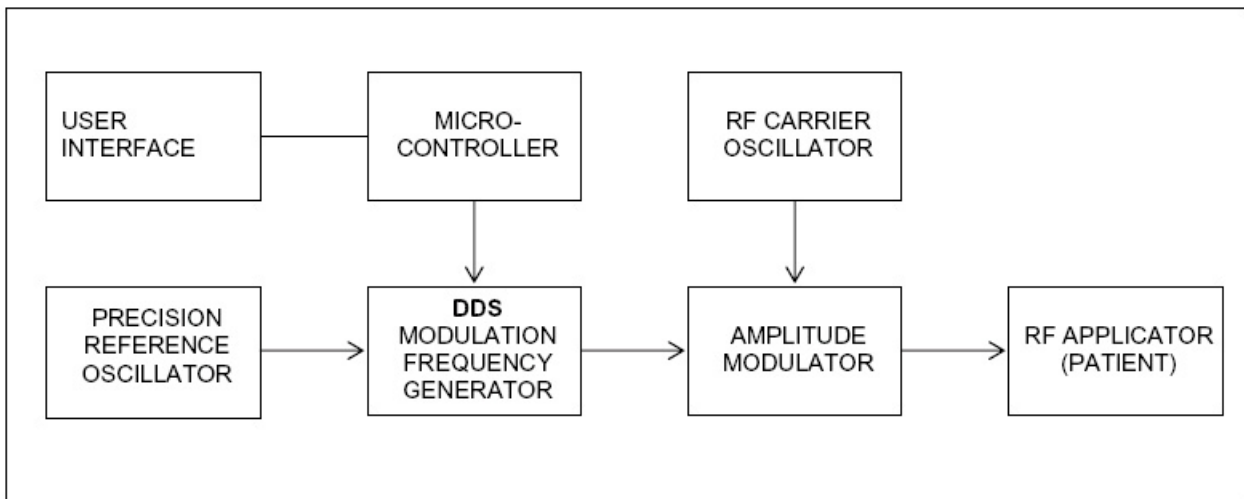

Supplement: MOESM1 [file 9661710]
